# Supplementary material for: (In-)formal caregivers’ and general practitioners’ views on hospitalizations of people with dementia - an exploratory qualitative interview study
Source: Springer Nature journal article supplement (doi:10.1186/s12913-017-2484-9), 2017-08-04
Supplement: MOESM1 [file 13349954]

### **Guideline version 1: Informal caregiver (home care)**

|                                                                                                                                          |
|------------------------------------------------------------------------------------------------------------------------------------------|
| You care for Mr./Mrs. XY. Tell me about a day in the life of Mr./Mrs. XY.                                                                |
| Mr./Mrs. XY was in the hospital some time ago. How did it happen that Mr./Mrs. XY was admitted to the hospital?                          |
| Tell me about the state of Mr./Mrs. XY's physical and mental health.<br>In what state was Mr./Mrs. XY before his/her last hospital stay? |
| What do you usually do when you notice that Mr./Mrs. XY is not feeling well?<br>Whom do you speak with?                                  |
| What are you missing in caring for Mr./Mrs. XY?                                                                                          |
| Was Mr./Mrs. XY's hospital stay necessary? In your opinion, how could the hospital admission have been avoided?                          |
| Do you want to add something else? Is there something important we have not talked about?                                                |

### **Guideline version 2: Informal caregiver (nursing home)**

|                                                                                                                                                             |
|-------------------------------------------------------------------------------------------------------------------------------------------------------------|
| Mr./Mrs. XY lives in a nursing home. Tell us what you have to do for and with Mr./Mrs. XY in a typical week.                                                |
| Mr./Mrs. XY was in the hospital some time ago. How did it happen that Mr./Mrs. XY was admitted to the hospital?                                             |
| Tell me about the state of Mr./Mrs. XY's physical and mental health.<br>In what state was Mr./Mrs. XY before his/her last hospital stay?                    |
| What do you usually do when you notice that Mr./Mrs. XY is not feeling well?<br>With whom do you speak?<br>What happens if Mr./Mrs. XY is not feeling well? |
| Do you speak with the professional caregivers about Mr./Mrs. XY's state of health? How does that usually work? Would you give an example?                   |
| How is the contact between the professional caregivers/nursing home and the general practitioner?                                                           |
| What are you missing in the care of Mr./Mrs. XY?                                                                                                            |
| Was Mr./Mrs. XY's hospital stay necessary? In your opinion, how could the hospital admission have been avoided?                                             |
| Do you want to add something else? Is there something important we have not talked about?                                                                   |

### **Guideline version 3: General practitioners (home care)**

|                                                                                                                                                                                                                                                                                                                                      |
|--------------------------------------------------------------------------------------------------------------------------------------------------------------------------------------------------------------------------------------------------------------------------------------------------------------------------------------|
| Tell me about the state of Mr./Mrs. XY's physical and mental health.<br>In what state was Mr./Mrs. XY before his/her last hospital stay?                                                                                                                                                                                             |
| Describe your relationship to Mr./Mrs. XY.                                                                                                                                                                                                                                                                                           |
| Mr./Mrs. XY is cared for at home. Which topics do you talk about with Mr./Mrs. XY's caregiving relatives?                                                                                                                                                                                                                            |
| Has an emergency plan been made with the relatives in case Mr./Mrs. XY becomes ill? What does this plan look like?                                                                                                                                                                                                                   |
| Mr./Mrs. XY was in the hospital some time ago. How did it happen that Mr./Mrs. XY was admitted to the hospital?                                                                                                                                                                                                                      |
| How would you assess the hospital admission(s) regarding its/their necessity? Would you admit Mr./Mrs. XY to the hospital if the same situation came up again? If not, why not?<br>If considered unnecessary: How could the hospital admission have been avoided in your opinion? Is there anything one could have done differently? |
| In your opinion, what is missing in the care for Mr./Mrs. XY?                                                                                                                                                                                                                                                                        |
| Do you want to add something else? Is there something important we have not talked about?                                                                                                                                                                                                                                            |

#### **Guideline version 4: General practitioner (nursing home)**

|                                                                                                                                                                                                                                                                                                                                       |
|---------------------------------------------------------------------------------------------------------------------------------------------------------------------------------------------------------------------------------------------------------------------------------------------------------------------------------------|
| Tell me about the state of Mr./Mrs. XY's physical and mental health.<br>In what state was Mr. /Mrs. XY before his/her last hospital stay?                                                                                                                                                                                             |
| Describe your relationship to Mr./Mrs. XY.                                                                                                                                                                                                                                                                                            |
| Mr./Mrs. XY is cared for in a nursing home. What kind of contact takes place between you and the nursing home /nursing staff?                                                                                                                                                                                                         |
| How would you describe the general handling of hospital admissions through the nursing home?                                                                                                                                                                                                                                          |
| Which topics do you talk about with the nursing home/nursing staff?                                                                                                                                                                                                                                                                   |
| Which topics do you talk about with Mr./Mrs. XY's relatives about?                                                                                                                                                                                                                                                                    |
| Has an emergency plan been made with the relatives or the nursing home in case Mr./Mrs. XY becomes ill? What does this plan look like?                                                                                                                                                                                                |
| Mr./Mrs. XY was in the hospital some time ago. How did it happen that Mr. /Mrs. XY was admitted to the hospital?                                                                                                                                                                                                                      |
| How would you assess the hospital admission(s) regarding its/their necessity?<br>Would you admit Mr./Mrs. XY to the hospital if the same situation came up again? If not, why not?<br>If considered unnecessary: How could the hospital stay have been avoided in your opinion?<br>Is there anything one could have done differently? |
| In your opinion, what is missing in the care of Mr./Mrs. XY?                                                                                                                                                                                                                                                                          |
| Do you want to add something else? Is there something important we have not talked about?                                                                                                                                                                                                                                             |

#### **Guideline version 5: formal caregiver (nursing home)**

|                                                                                                                                                                                                                                                                     |
|---------------------------------------------------------------------------------------------------------------------------------------------------------------------------------------------------------------------------------------------------------------------|
| You work here in the nursing home. Tell us about a typical work day caring for Mr./Mrs. XY.                                                                                                                                                                         |
| Who comes to visit Mr./Mrs. XY in the nursing home?                                                                                                                                                                                                                 |
| With which of Mr./Mrs. XY's relatives are you in contact?                                                                                                                                                                                                           |
| What kind of contact takes place between yourself and Mr./Mrs. XY's relatives?                                                                                                                                                                                      |
| Which topics do you speak about when speaking with Mr./Mrs. XY's relatives?                                                                                                                                                                                         |
| Mr./Mrs. XY's also has an attending general practitioner. What kind of contact takes place between you and the general practitioner?<br>When and how often does the general practitioner come? What happens if a resident needs a physician between planned visits? |
| Which topics do you talk about with the general practitioner?                                                                                                                                                                                                       |
| Does the general practitioner do more house calls on Mr. /Mrs. XY or does he/she generally go to the practice?                                                                                                                                                      |
| Tell me about the state of Mr./Mrs. XY's physical and mental health.<br>In what state was Mr./Mrs. XY before his/her last hospital stay?                                                                                                                            |
| Mr./Mrs. XY was in the hospital some time ago. How did it happen that Mr. /Mrs. XY was admitted to the hospital?                                                                                                                                                    |
| Was Mr./Mrs. XY's hospital stay necessary?<br>In the same situation, would you allow Mr./Mrs. XY to be admitted to the hospital again? If not, why not?<br>If considered unnecessary: How could the hospital stay have been avoided in your opinion?                |
| How do you usually deal with Mr./Mrs. XY's illnesses or those of other nursing home residents?<br>When do you decide to call a doctor?                                                                                                                              |
| In your opinion, what is missing in the care of Mr./Mrs. XY?                                                                                                                                                                                                        |
| Do you want to add something else? Is there something important we have not talked about?                                                                                                                                                                           |
